# Supplementary material for: Addition of L-cysteine to the N- or C-terminus of the all-D-enantiomer [D(KLAKLAK)2] increases antimicrobial activities against multidrug-resistant Pseudomonas aeruginosa, Acinetobacter baumannii and Escherichia coli
Source: PeerJ. 2020 Nov 30;8:e10176. doi: 10.7717/peerj.10176 (PMC7713595; doi:10.7717/peerj.10176)
Supplement: File S1 [file peerj-08-10176-s007.xlsx]

## Sheet: Sheet1
			Cell Survival (%)
	Conc. of DP-C (μg/ml)		2	4	8	16	32	64	128	256
	Conc. of colistin (μg/ml)		0.2	0.4	0.8	1.6	3.2	6.4	12.8	25.6
		Replicate 1	101.974	145.921	110	106.447	83.6842	83.8158	56.4474	23.5526
		Replicate 2	98.0263	115.263	116.842	94.6053	103.816	82.2368	61.4474	24.2105
		Replicate 3	100	109.428	104.189	95.4438	97.886	92.5683	86.187	29.4249
		Mean	100	123.537	110.344	98.8321	95.1287	86.207	68.0272	25.7293
		Std. Devi	1.97368	19.6033	6.33378	6.60829	10.3452	5.56533	15.9243	3.21729
		Std. Error	0.930404	9.24109	2.98577	3.11518	4.87676	2.62352	7.50677	1.51665
				p > 0.05	p > 0.05	p > 0.05	p > 0.05	* 0.01 < p < 0.05	* 0.01 < p < 0.05	** p < 0.01
		Significant differences between each concentration and the control (2µg/ml DP-C and 0.2 µg/ml colistin) were statistically evaluated by Student's t-test (*p < 0.05, **p < 0.01).
