# Supplementary material for: Addition of L-cysteine to the N- or C-terminus of the all-D-enantiomer [D(KLAKLAK)2] increases antimicrobial activities against multidrug-resistant Pseudomonas aeruginosa, Acinetobacter baumannii and Escherichia coli
Source: PeerJ. 2020 Nov 30;8:e10176. doi: 10.7717/peerj.10176 (PMC7713595; doi:10.7717/peerj.10176)
Supplement: File S2 [file peerj-08-10176-s008.xlsx]

## Sheet: Sheet1
			Cell Survival (%)
	Conc. of peptides (μg/ml)		0	4	8	16	32	64	128	256
	DP
		Replicate 1	99.2951	110.977	83.7865	102.417	102.719	93.6556	102.719	91.4401
		Replicate 2	100.705	105.639	91.8429	106.143	91.6415	87.8147	103.625	87.5126
		Replicate 3	100	107.552	93.8044	93.1363	88.7022	88.6212	81.7169	84.4705
		Mean	100	108.056	89.8113	100.565	94.3542	90.0305	96.0205	87.8077
		Std. Devi	0.704935	2.70414	5.30898	6.69813	7.39171	3.16522	12.3955	3.49413
		Std. Error	0.332309	1.27474	2.50268	3.15753	3.48448	1.4921	5.84329	1.64715
	DP-C
		Replicate 1	99.8093	111.058	113.251	94.9476	100.477	89.5138	80.7436	23.2602
		Replicate 2	100.191	108.294	98.5701	112.965	86.654	84.2707	74.9285	22.5929
		Replicate 3	100	109.428	95.9165	106.749	106.394	93.041	94.1439	29.4249
		Mean	100	109.593	102.579	104.887	97.8417	88.9418	83.272	25.0927
		Std. Devi	0.190658	1.38969	9.33665	9.15174	10.1306	4.413	9.85406	3.7666
		Std. Error	0.0898769	0.655105	4.40134	4.31417	4.7756	2.08031	4.64525	1.77559
	C-DP
		Replicate 1	102.469	91.3816	82.7198	103.941	91.9879	87.3971	93.9801	58.2936
		Replicate 2	97.5314	97.3582	106.973	104.547	110.178	100.217	98.3976	78.7354
		Replicate 3	100	108.307	102.395	102.919	93.1712	90.0281	96.015	67.2778
		Mean	100	99.0155	97.3624	103.802	98.4455	92.5472	96.1309	68.1023
		Std. Devi	2.4686	8.58349	12.8858	0.823217	10.1774	6.77082	2.21103	10.2458
		Std. Error	1.16371	4.0463	6.07443	0.388068	4.79769	3.19179	1.04229	4.82991
