# Supplementary material for: Addition of L-cysteine to the N- or C-terminus of the all-D-enantiomer [D(KLAKLAK)2] increases antimicrobial activities against multidrug-resistant Pseudomonas aeruginosa, Acinetobacter baumannii and Escherichia coli
Source: PeerJ. 2020 Nov 30;8:e10176. doi: 10.7717/peerj.10176 (PMC7713595; doi:10.7717/peerj.10176)
Supplement: File S3 [file peerj-08-10176-s009.xlsx]

## Sheet: Sheet1
			Cell Survival (%)
	Conc. of colistin (μg/ml)		0	31	94	188	375	750	1500	3000
		Replicate 1	102.153	101.3	93.4984	95.8145	91.4261	81.613	71.4342	30.4754
		Replicate 2	102.275	98.1306	100.203	98.6182	89.1099	75.6398	55.587	35.9
		Replicate 3	95.5707	103.921	94.1688	82.1616	87.3424	82.3444	61.7431	34.5591
		Mean	99.9998	101.117	95.9567	92.1981	89.2928	79.8657	62.9214	33.6448
		Std. Devi	3.83618	2.89949	3.69259	8.80423	2.04798	3.67798	7.98904	2.82551
		Std. Error	1.80839	1.36683	1.74071	4.15035	0.965427	1.73381	3.76607	1.33196
