# Supplementary material for: Addition of L-cysteine to the N- or C-terminus of the all-D-enantiomer [ D (KLAKLAK) 2 ] increases antimicrobial activities against multidrug-resistant Pseudomonas aeruginosa, Acinetobacter baumannii and Escherichia coli
Source: PeerJ journal article supplement (doi:10.7717/peerj.10176), 2020-11-30

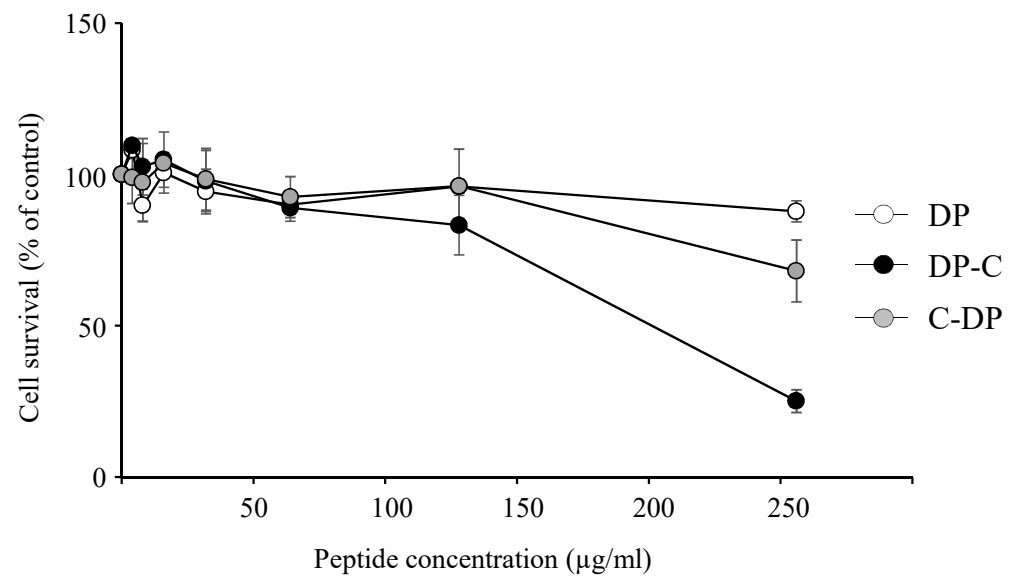

Supplement: Supplemental_figure_S5.pdf [file Supplemental_figure_S5.pdf]
